# Supplementary material
Source: publisher figshare collection journal article supplement (https://frontiersin.figshare.com/ndownloader/files/21493866)
Supplement: Supplementary file [file 21493866]

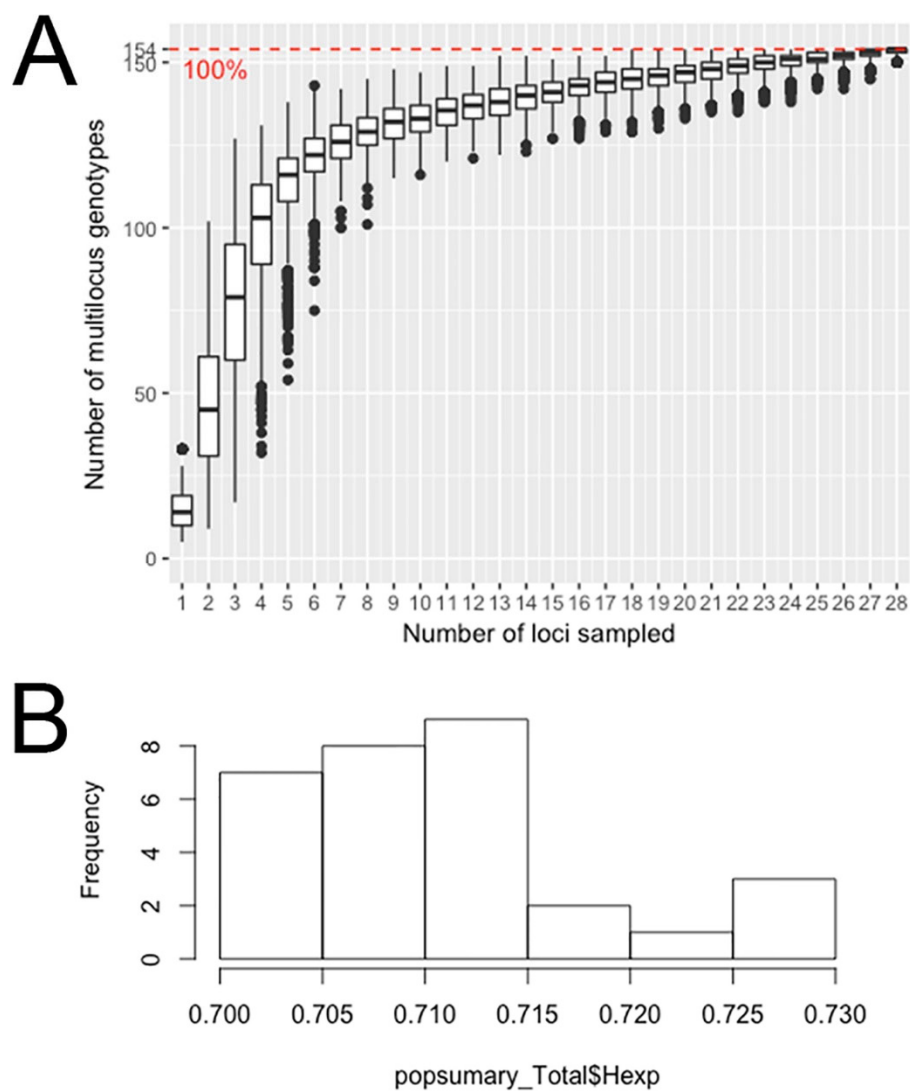

**Figure S2.** Informative accumulation of SSR markers. A. Genotype accumulation curve showing the percentage of discrimination ability between individuals of  $n$  loci. B. Nei's unbiased gene diversity produced by sequentially subtracting each SSR marker for 28 analysed markers.
